# Supplementary material for: Production of Bacterial Cellulose in the Medium with Yeasts Pre-Fermented Coconut Water or with Addition of Selected Amino Acids
Source: MDPI journal article supplement (doi:10.3390/foods11223627), 2022-11-14
Supplement: s1 [file s1]

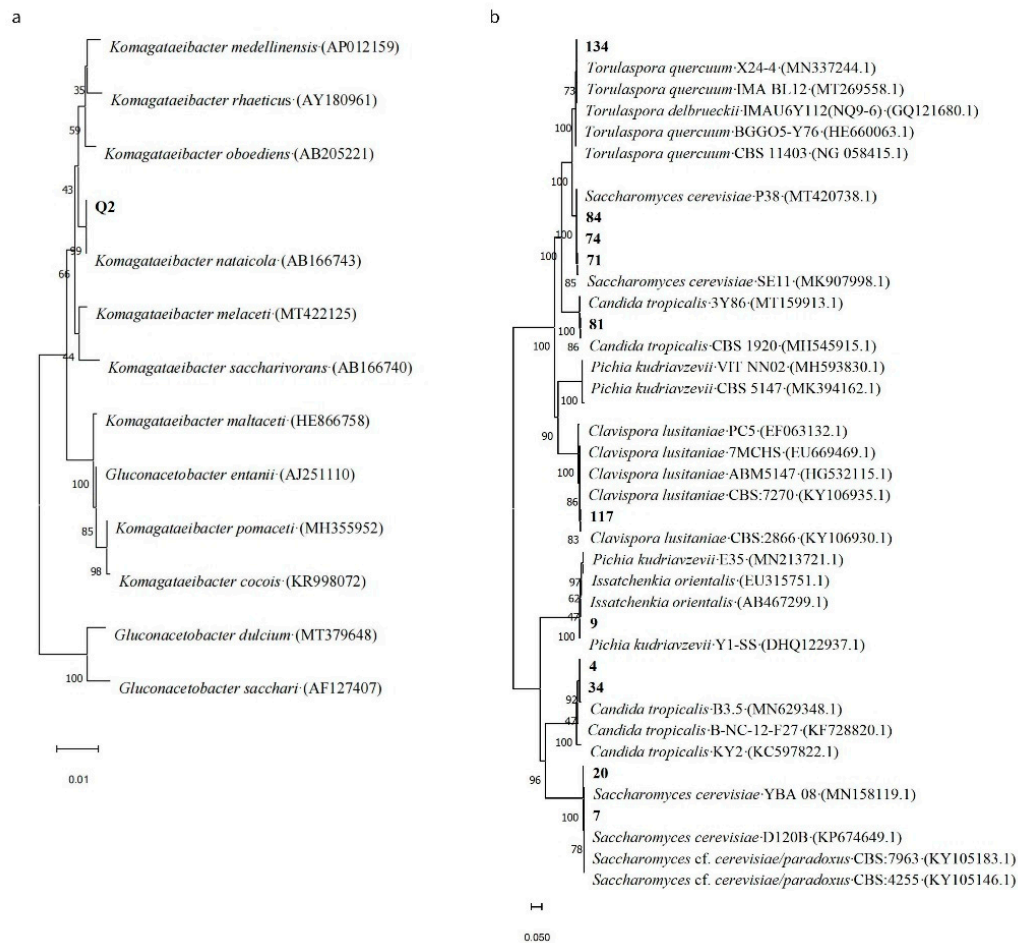

**Figure S1** Phylogenetic trees. (a) Phylogenetic tree based on the 16S rDNA sequence of the BC-yielding strain Q2; (b) Phylogenetic trees based on the ITS sequences of yeast strains 4, 34, 7, 20, and 9 and the 26S rDNA sequences of strains 81, 71, 74, 84, 134, and 117. Sequencing results were analyzed using NCBI Blast (<https://blast.ncbi.nlm.nih.gov/Blast.cgi>). Multiple sequences alignment was conducted by a MAGA11 software using the p-distance method. Phylogenetic trees were constructed using a Neighbor-joining method.

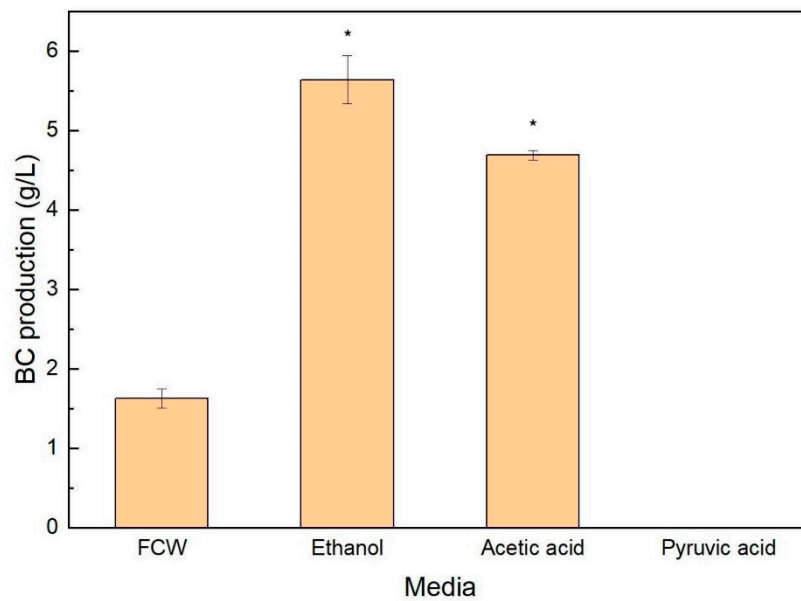

**Figure S2** Effect of addition of ethanol, acetic acid, and pyruvic acid on the production of BC. FCW: fresh coconut water medium; Ethanol: FCW medium containing 1.0% ethanol; Acetic acid: FCW medium containing 1.0% acetic acid; Pyruvic acid: FCW medium containing 1.0% pyruvic acid. Significant differences of the samples to the control group FCW were confirmed at \*  $p < 0.05$  (n=3).

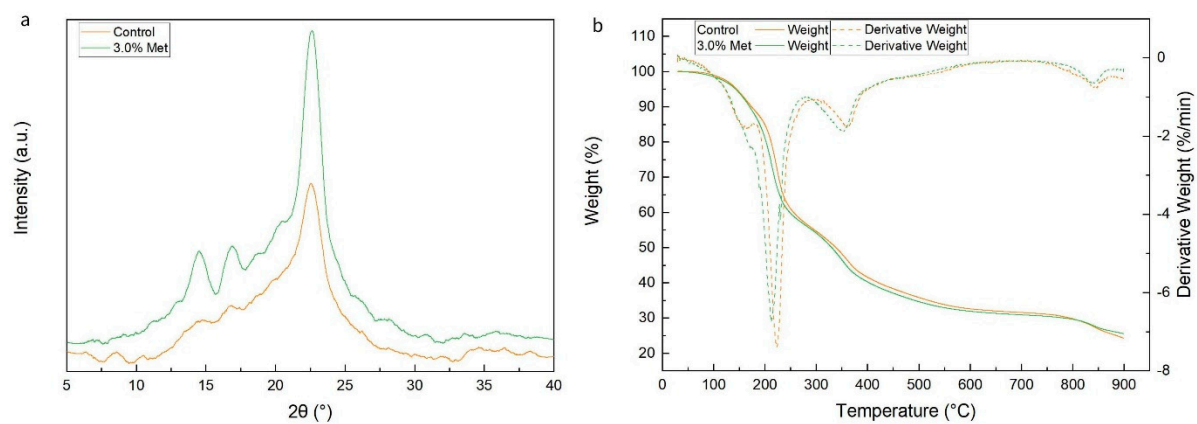

**Figure S3** XRD diffractograms (a) and thermogravimetry curves (b) of BC membranes.

Control: the BC membrane obtained in the FCW medium; 3.0% Met: the BC membrane obtained in the FCW medium with the addition of 3.0% methionine.
